# Supplementary material for: Dramatic differences in the fluorescence of AIEgen-doped micro- and macrophase separated systems
Source: Royal Society of Chemistry journal article supplement (doi:10.1039/c7tc04771a), 2017-12-01
Supplement: c7tc04771a1.pdf [file c7tc04771a1.pdf]

## Dramatic differences in fluorescence of AIEgens-doped micro- and macrophase separated systems

Zehua Song,<sup>a</sup> Xiaolin Lv,<sup>b</sup> Longcheng Gao,<sup>a,\*</sup> Lei Jiang <sup>a,c</sup>

<sup>a</sup> Laboratory of Bio-Inspired Smart Interfacial Science and Technology of Ministry of Education, Key Laboratory of Beijing Energy, School of Chemistry, Beihang University, Beijing 100191, P. R. China, \*E-mail: lcgao@buaa.edu.cn.

<sup>b</sup> Beijing National Laboratory for Molecular Sciences, Key Laboratory of Polymer Chemistry and Physics of Ministry of Education, College of Chemistry and Molecular Engineering, Peking University, Beijing, 100871, P. R. China.

<sup>c</sup> Key Laboratory of Bio-inspired Materials and Interfacial Science, Technical Institute of Physics and Chemistry, Chinese Academy of Sciences, Beijing 100190, P. R. China.

**a**

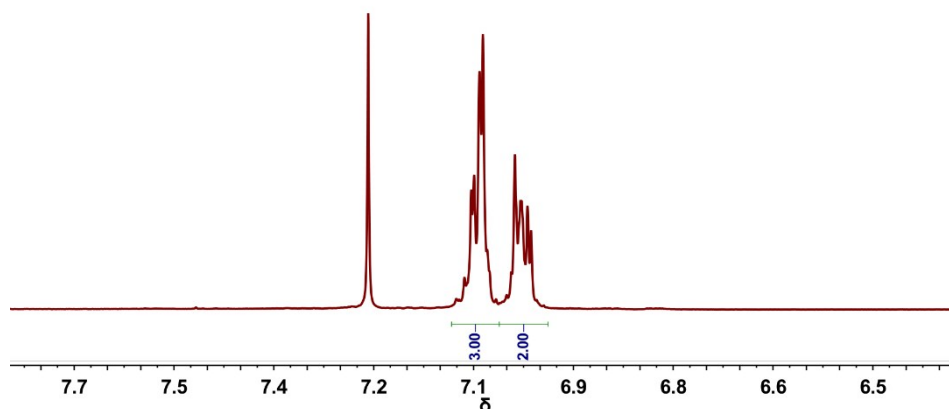

**b**

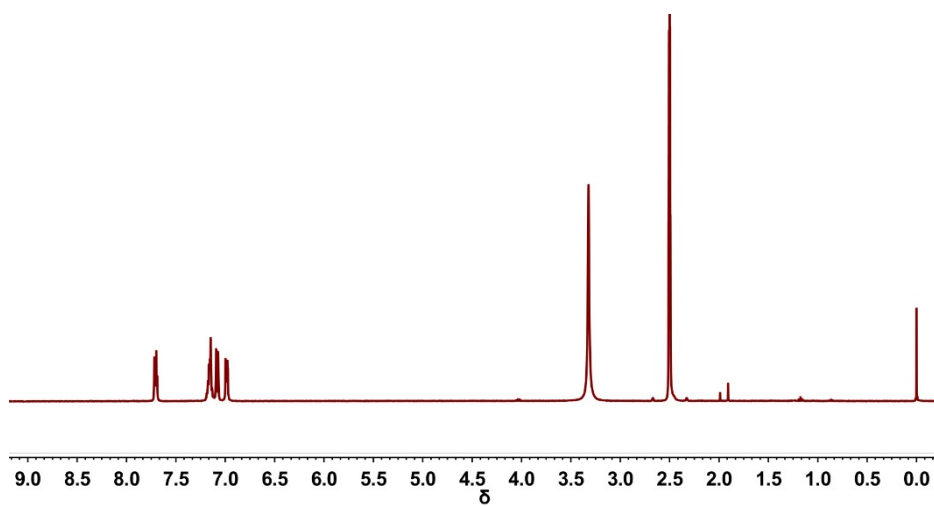

**c**

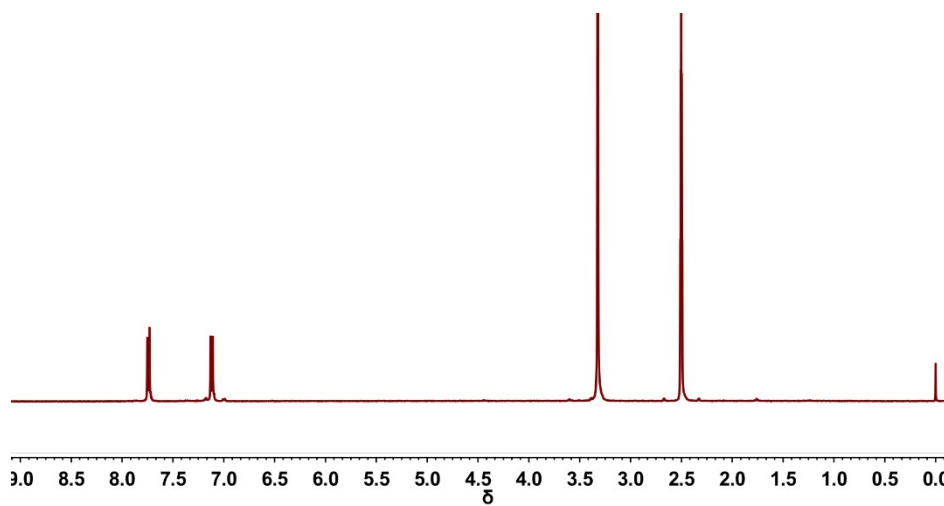

**d**

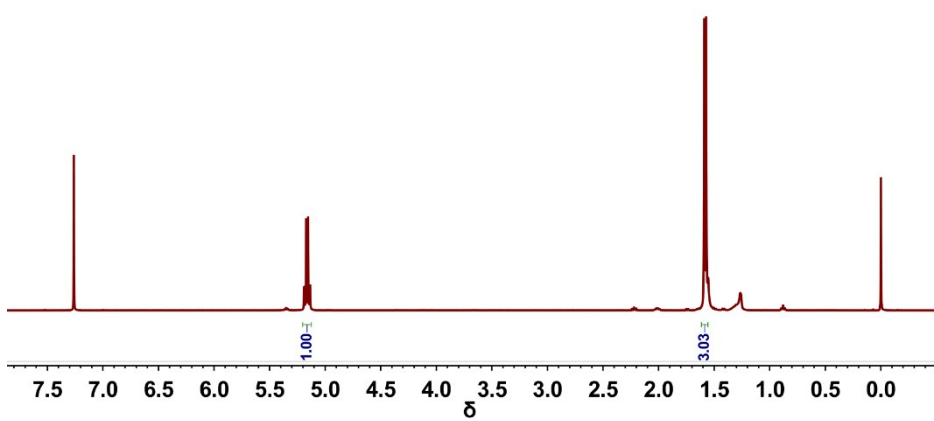

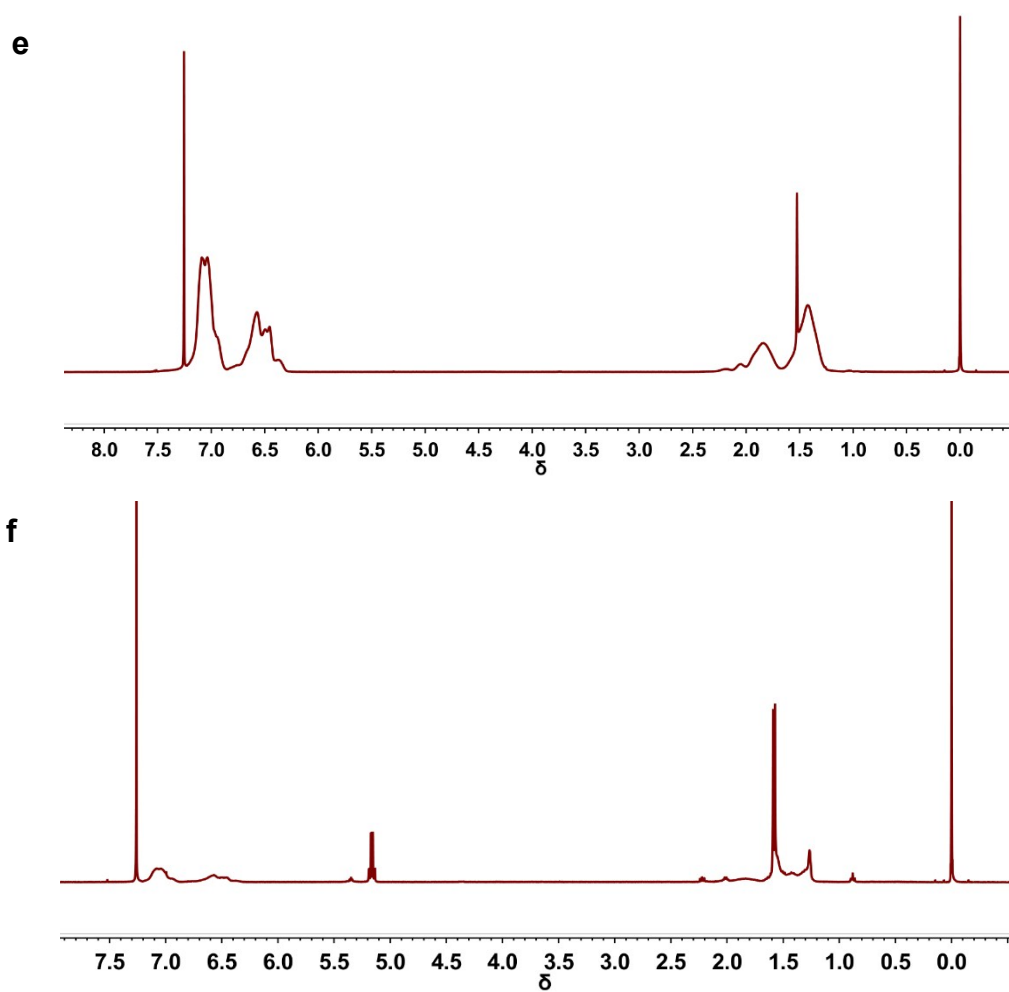

**Figure S1.** The  $^1\text{H}$ -NMR of (a) TPE, (b) TPE-2COOH, (c) TPE-4COOH, (d) PLA, (e) PS, (f) PS-*b*-PLA.

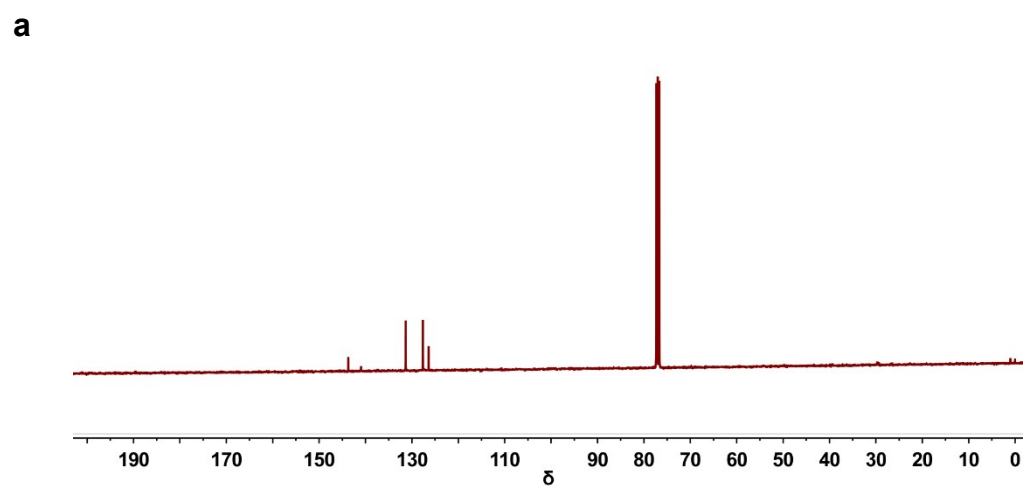

**b**

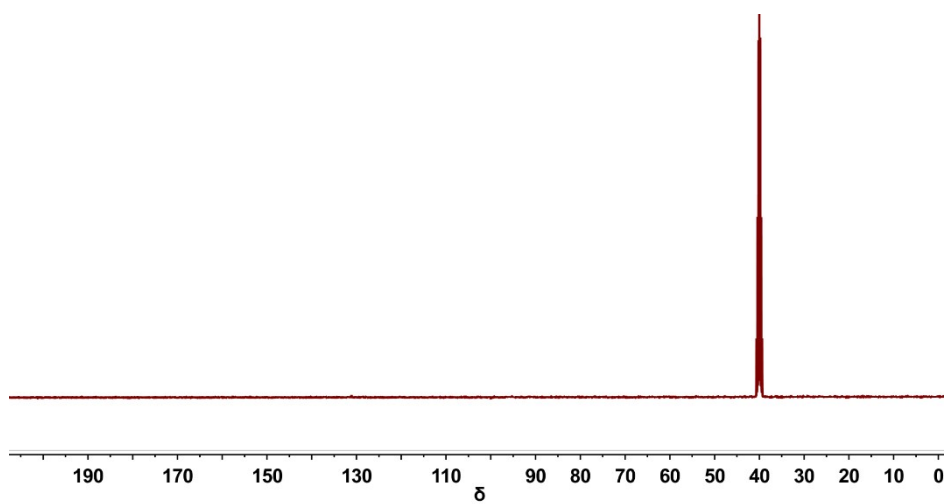

**c**

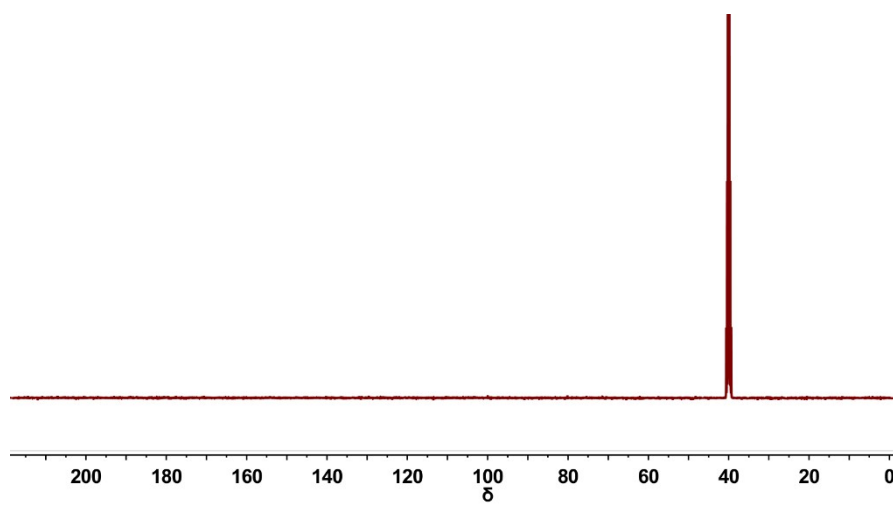

**d**

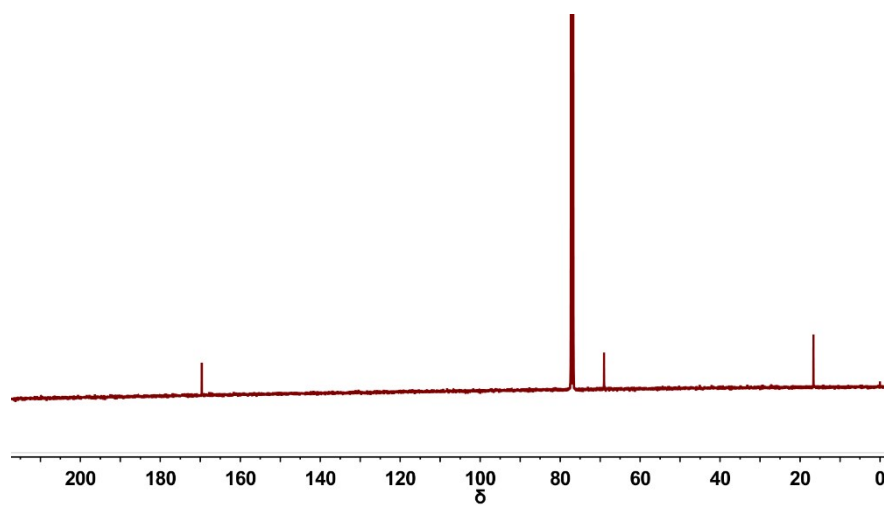

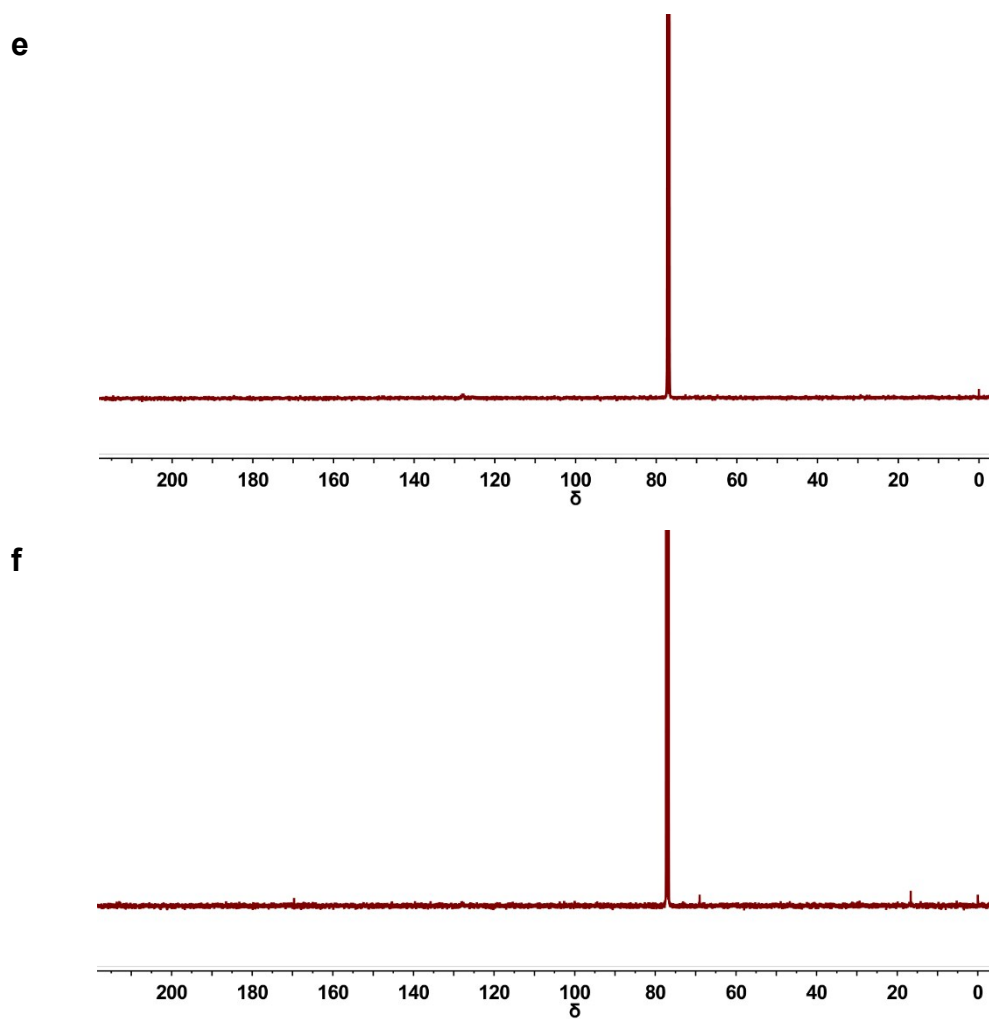

**Figure S2.** The  $^{13}\text{C}$ -NMR of (a) TPE, (b) TPE-2COOH, (c) TPE-4COOH, (d) PLA, (e) PS, (f) PS-*b*-PLA.

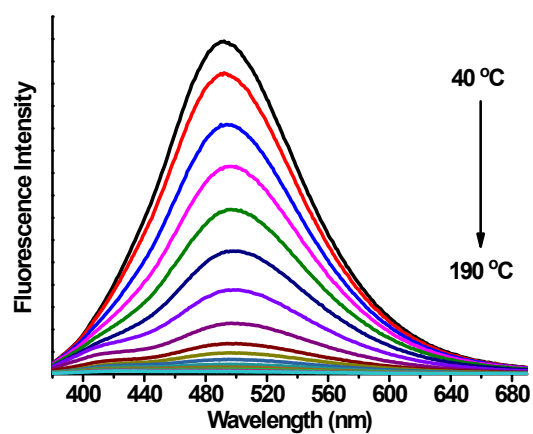

**Figure S3.** The fluorescence spectra of TPE@PS at different temperatures ranging from 40 °C to 190 °C.

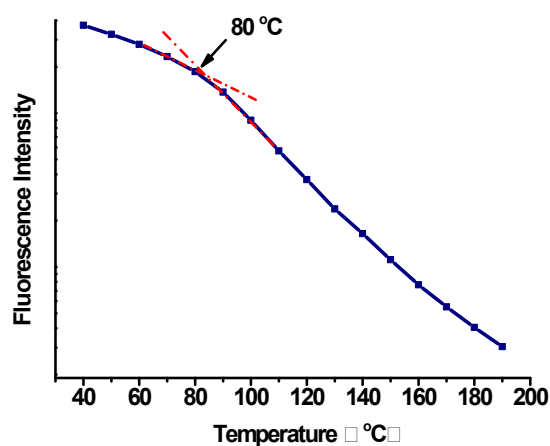

**Figure S4.** The fluorescence intensity of TPE@PS as a function of temperature, indicating one  $T_g$  of PS at 80 °C.

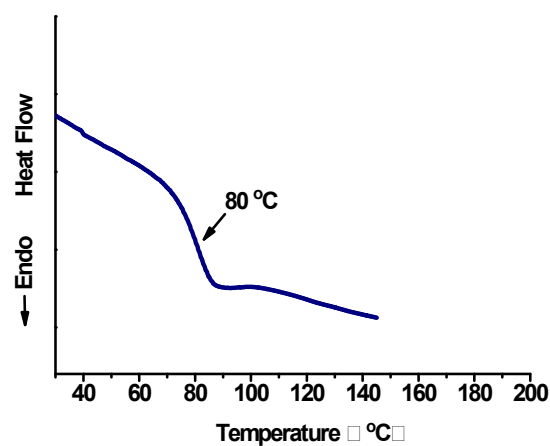

**Figure S5.** The DSC curve of the homopolymer TPE@PS, showing the  $T_g$  of PS at 80 °C, in accordance to the  $T_g$  of PS in Figure S2.

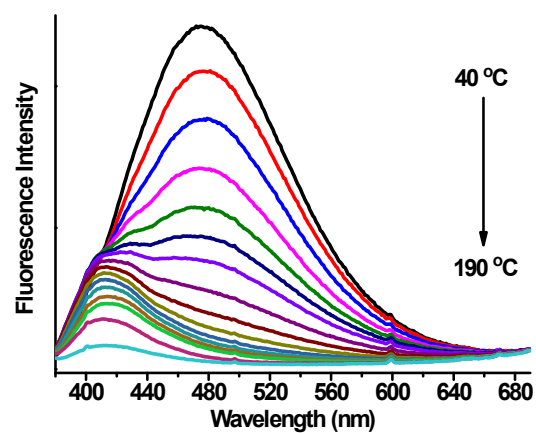

**Figure S6.** The fluorescence spectra of TPE@PLA at different temperatures ranging from 40 °C to 190 °C.

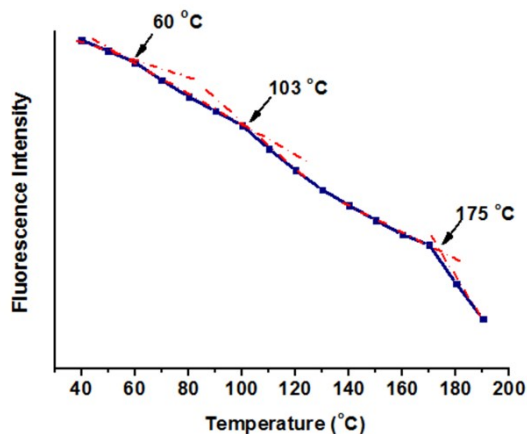

**Figure S7.** The fluorescence intensity of TPE@PLA as a function of temperature, indicating glass transition (60 °C), cold crystallization transition (103 °C) and Melting point ( $T_m=175$  °C).

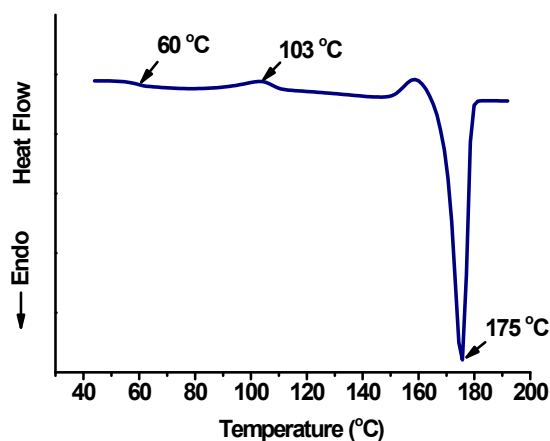

**Figure S8.** The DSC curve of the homopolymer TPE@PLA, showing glass transition (60 °C), cold crystallization transition (103 °C) and Melting point ( $T_m=175$  °C), in accordance to the results in Figure S5.

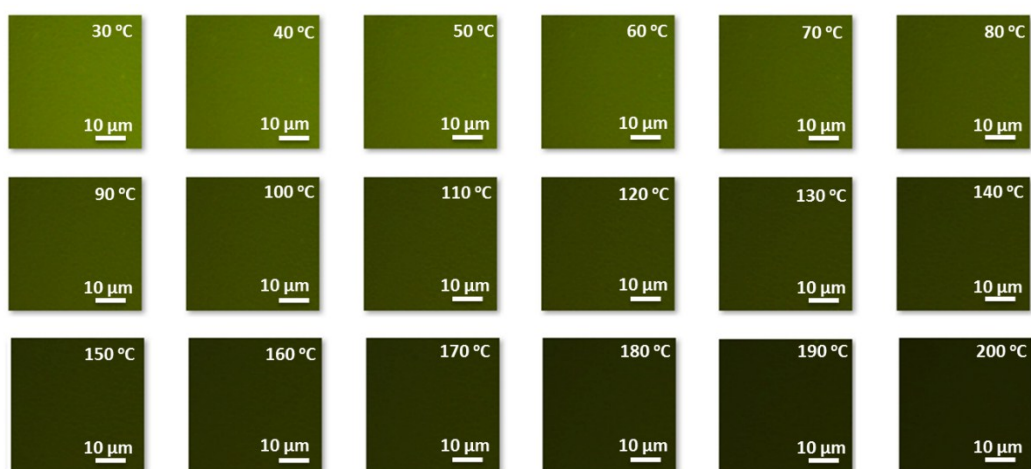

**Figure S9.** The fluorescent microscopy images of TPE@PS-*b*-PLA at different temperatures ranging from 30 °C to 200 °C.

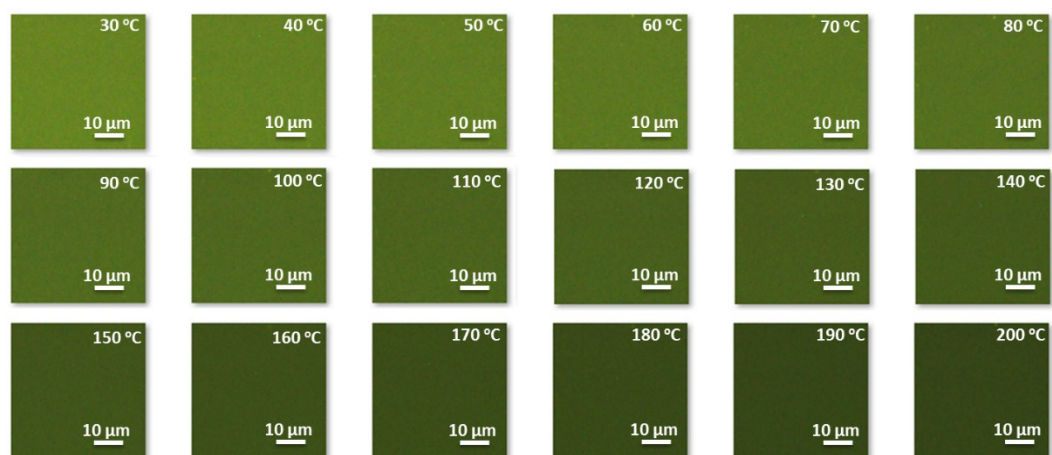

**Figure S10.** The fluorescent microscopy images of TPE@PS/PLA at different temperatures ranging from 30 °C to 200 °C.

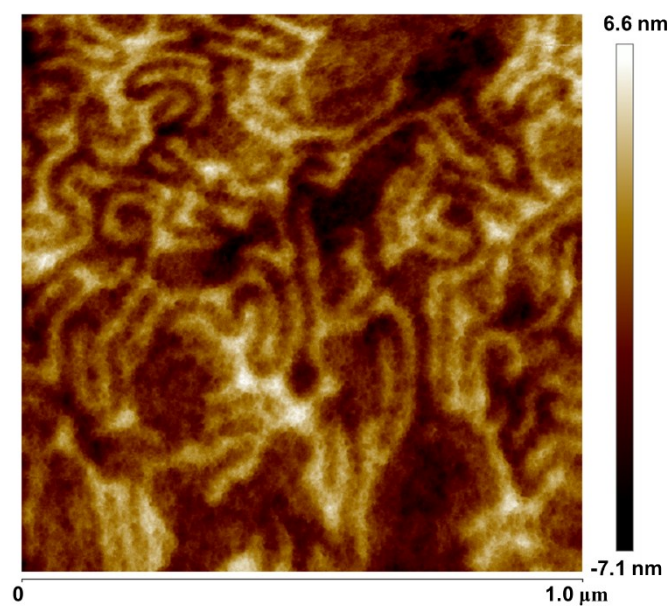

**Figure S11.** The AFM image of the block copolymer PS-*b*-PLA (Height image), indicating microphase separation structure.



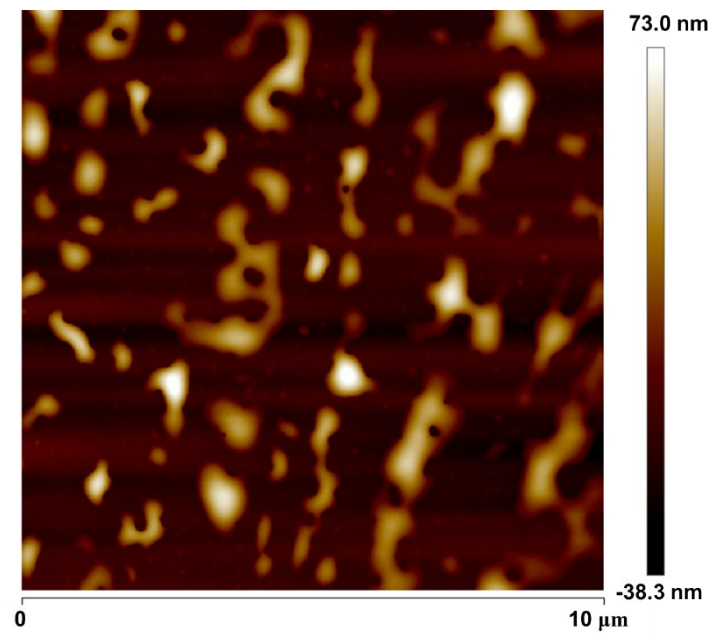

**Figure S12.** The AFM image of the polymer blend PS/PLA (Height image), indicating macrophase separation structure.

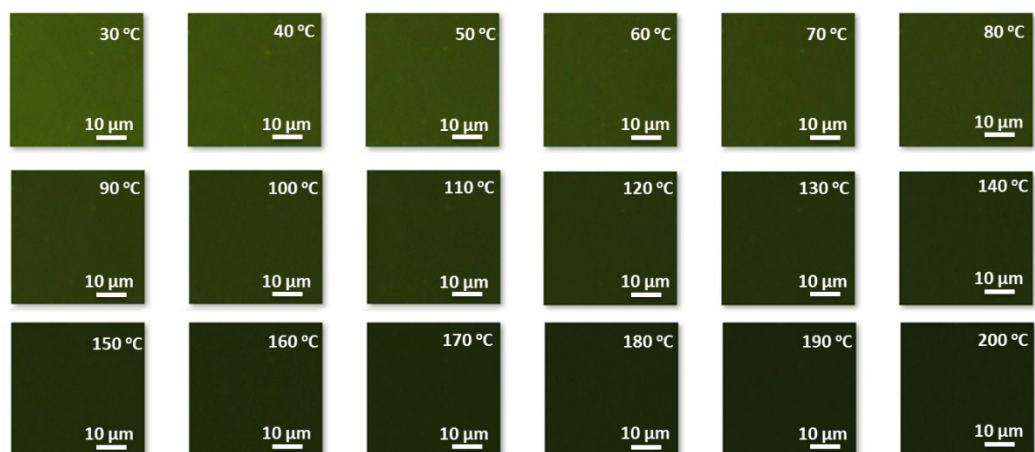

**Figure S13.** The fluorescent microscopy images of TPE-4COOH@PS-b-PLA at different temperatures ranging from 30 °C to 200 °C.

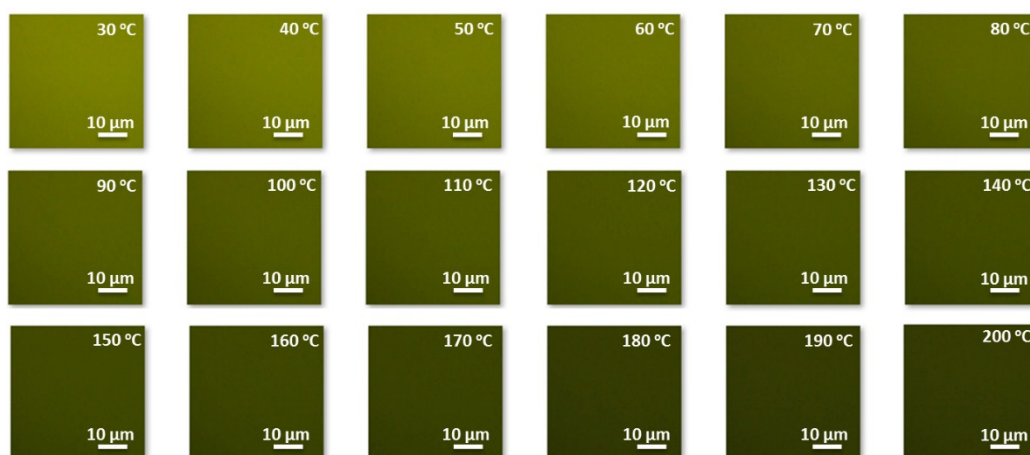

**Figure S14.** The fluorescent microscopy images of TPE-4COOH@PS/PLA at different temperatures ranging from 30 °C to 200 °C.

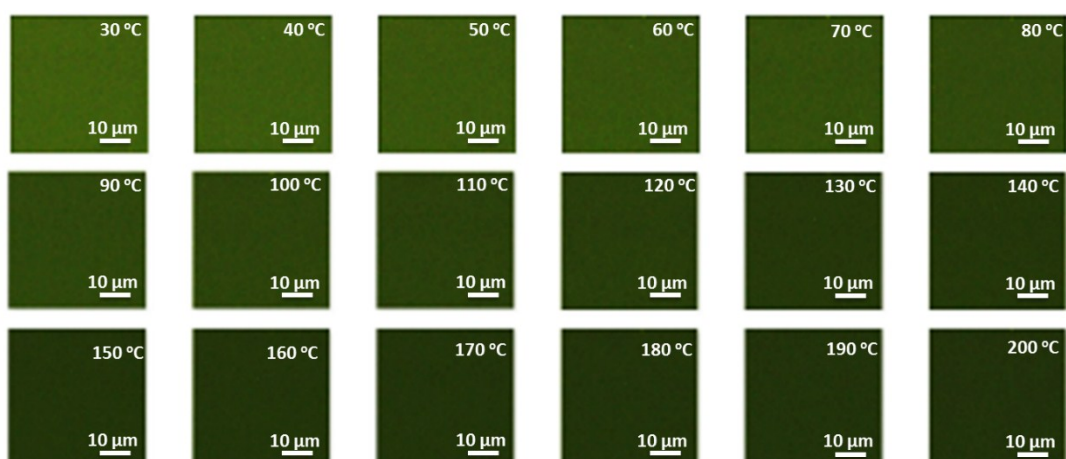

**Figure S15.** The fluorescent microscopy images of TPE-2COOH@PS-b-PLA at different temperatures ranging from 30 °C to 200 °C.

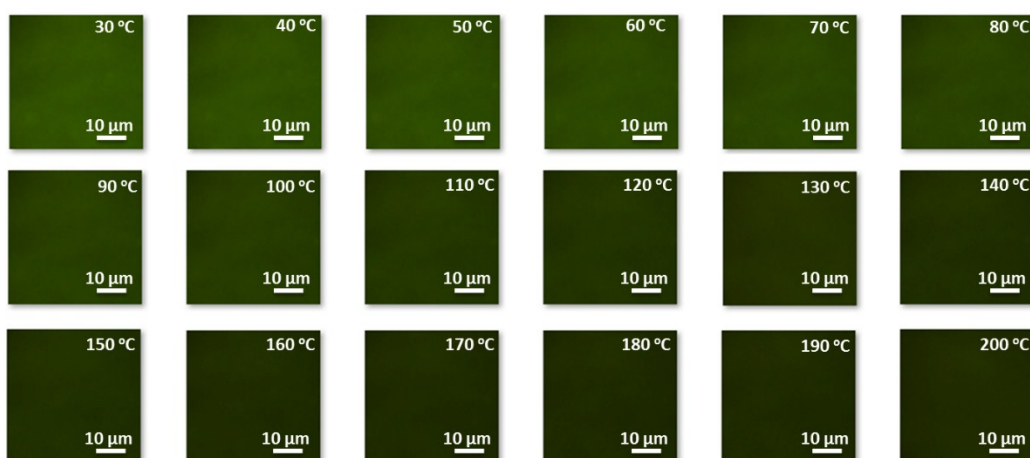

**Figure S16.** The fluorescent microscopy images of TPE-2COOH@PS/PLA at different temperatures ranging from 30 °C to 200 °C.
